# Supplementary material for: Paired Box-1 (PAX1) Activates Multiple Phosphatases and Inhibits Kinase Cascades in Cervical Cancer
Source: PubMed Central journal article supplement (PMC6591413; doi:10.1038/s41598-019-45477-5), 2019-06-24
Supplement: 41598_2019_45477_MOESM1_ESM.pdf [file 41598_2019_45477_MOESM1_ESM.pdf]

## Supplementary:

### **Paired Box-1 (PAX1) Activates Multiple Phosphatases and Inhibits Kinase Cascades in Cervical Cancer**

#### **Running title; PAX1 as a tumor suppressor in cervical cancer**

Po-Hsuan Su<sup>1, 2, †</sup>, Hung-Cheng Lai<sup>1, 2, 3, †</sup>, Rui-Lan Huang<sup>2, 3</sup>, Lin-Yu Chen<sup>4</sup>, , Yu-Chi Wang<sup>5</sup>, Tzu-I Wu<sup>3, 6</sup>, Michael WY Chan<sup>7, 8</sup>, Chi-Chun Liao<sup>2</sup>, Chien-Wen Chen<sup>2</sup>, Wei-Yu Lin<sup>9</sup>, Cheng-Chang Chang<sup>5, \*</sup>

†These authors contributed equally to this work.

The authors declare no potential conflicts of interest.

1. Translational epigenetics center, Shuang Ho Hospital, Taipei Medical University, New Taipei City, Taiwan.
2. Department of Obstetrics and Gynecology, Shuang Ho Hospital, Taipei Medical University, New Taipei City, Taiwan.
3. Department of Obstetrics and Gynecology, School of Medicine, College of Medicine, Taipei Medical University, Taipei, Taiwan.
4. Graduate Institute of Life Sciences, National Defense Medical Center, Taipei, Taiwan.
5. Department of Obstetrics and Gynecology, Tri-Service General Hospital, National Defense Medical Center, Taipei, Taiwan.
6. Department of Obstetrics and Gynecology, Wan Fang Hospital, Taipei Medical University, Taipei, Taiwan.

9. Northern Institute for Cancer Research, Newcastle University, Newcastle-upon-Tyne, UK.

**\*Correspondence author:**

Hung-Cheng Lai, M.D., Ph.D.,

No.291, Jhongjheng Rd., Jhonghe , New Taipei 23561, Taiwan

E-mail: [hclai30656@gmail.com](mailto:hclai30656@gmail.com); [hclai@s.tmu.edu.tw](mailto:hclai@s.tmu.edu.tw).

Supplemental Figure 1

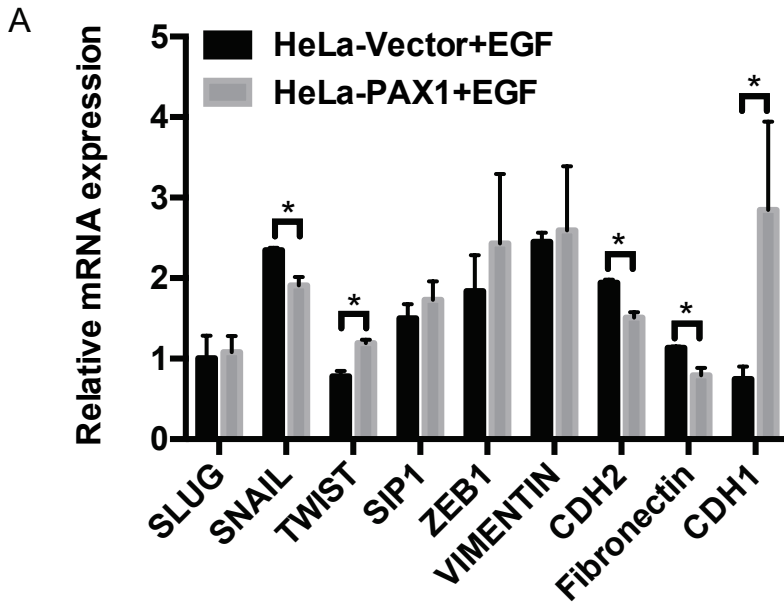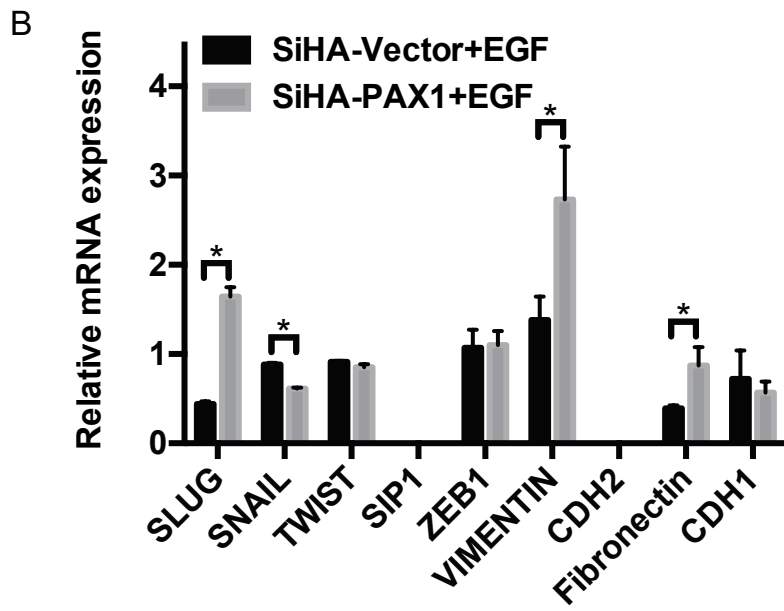

Supplemental Figure 2

A

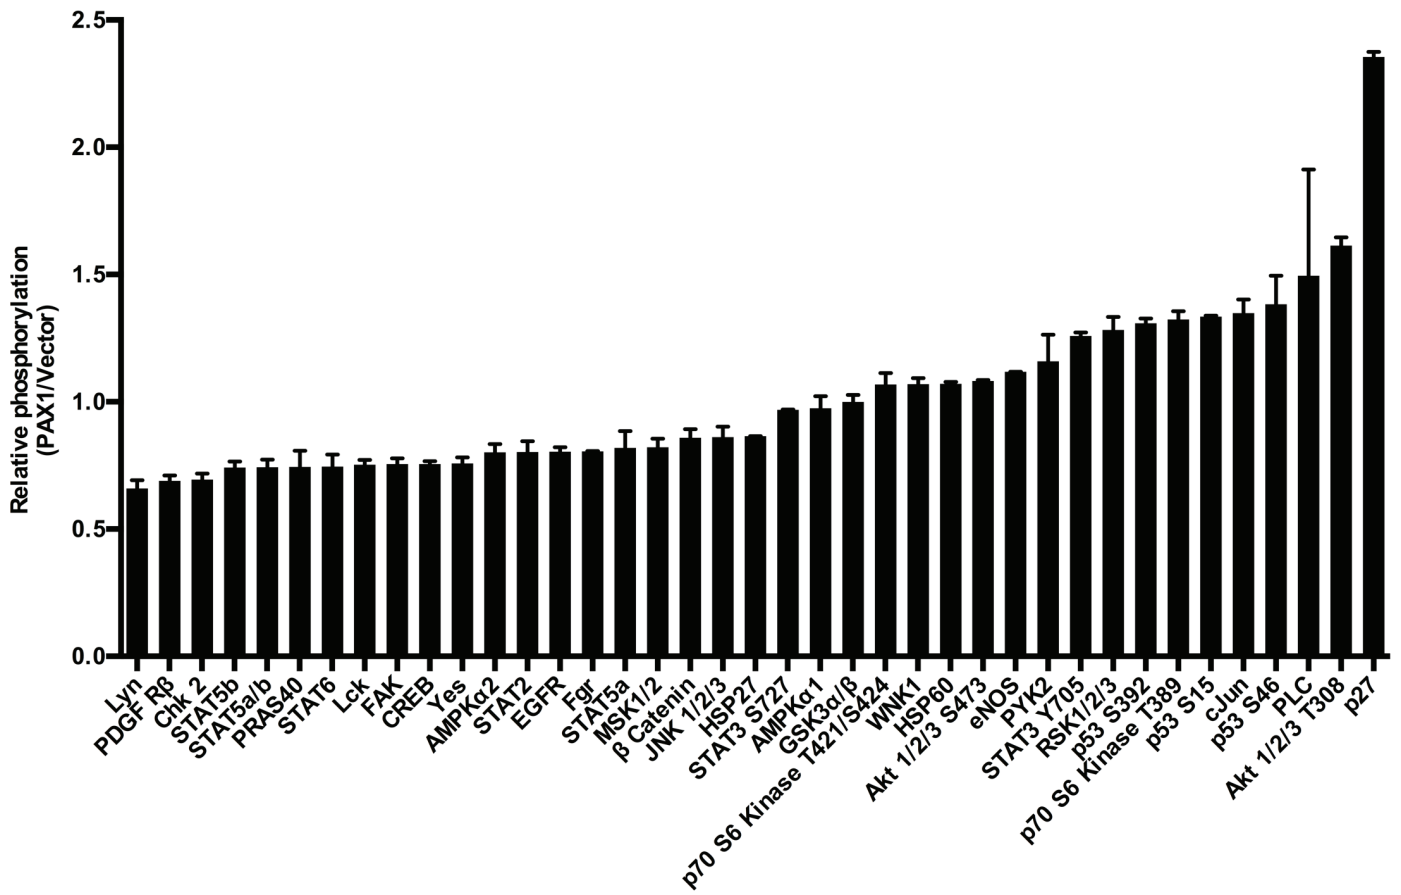

B

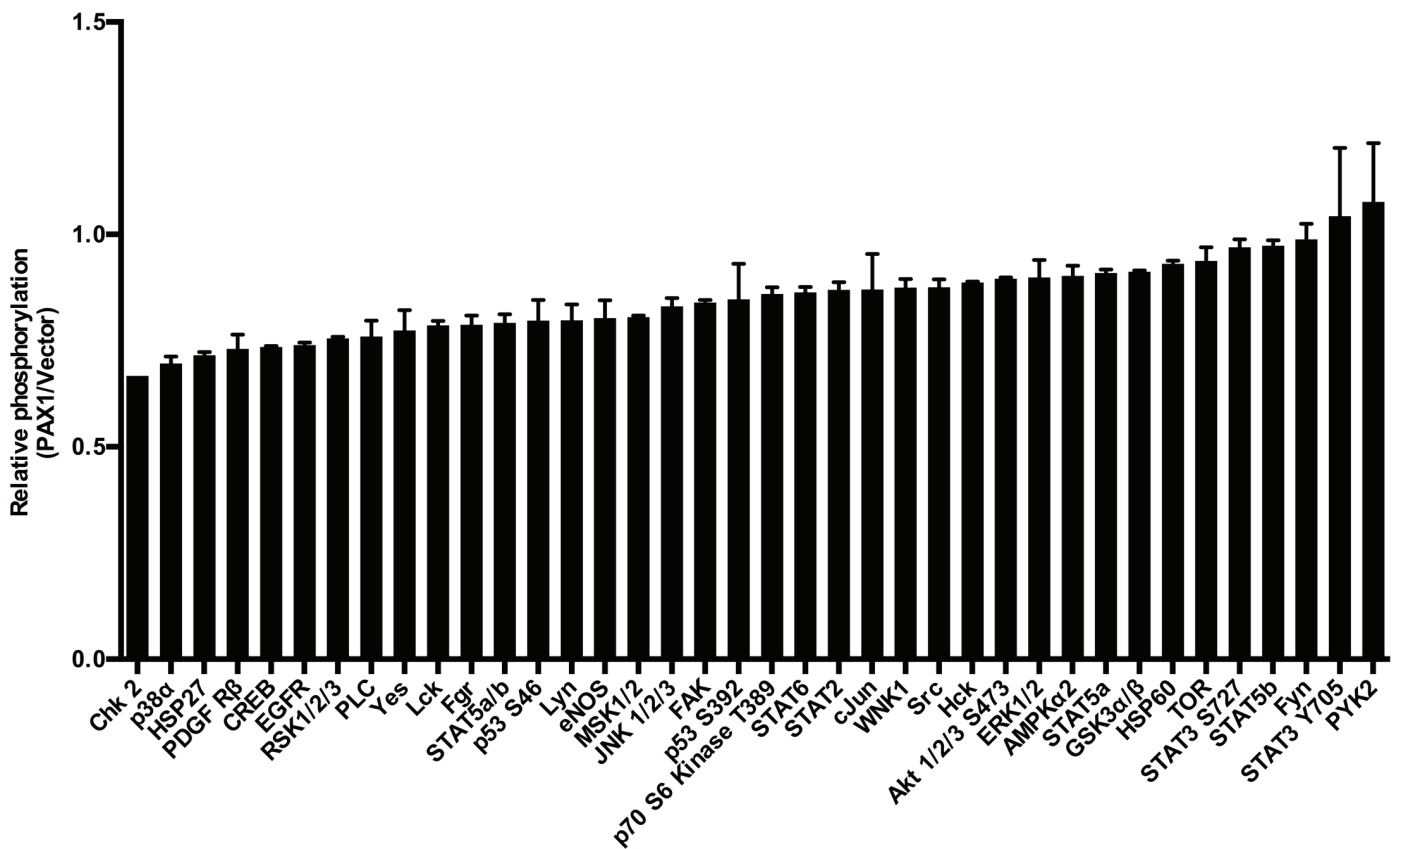

Supplemental Figure 3

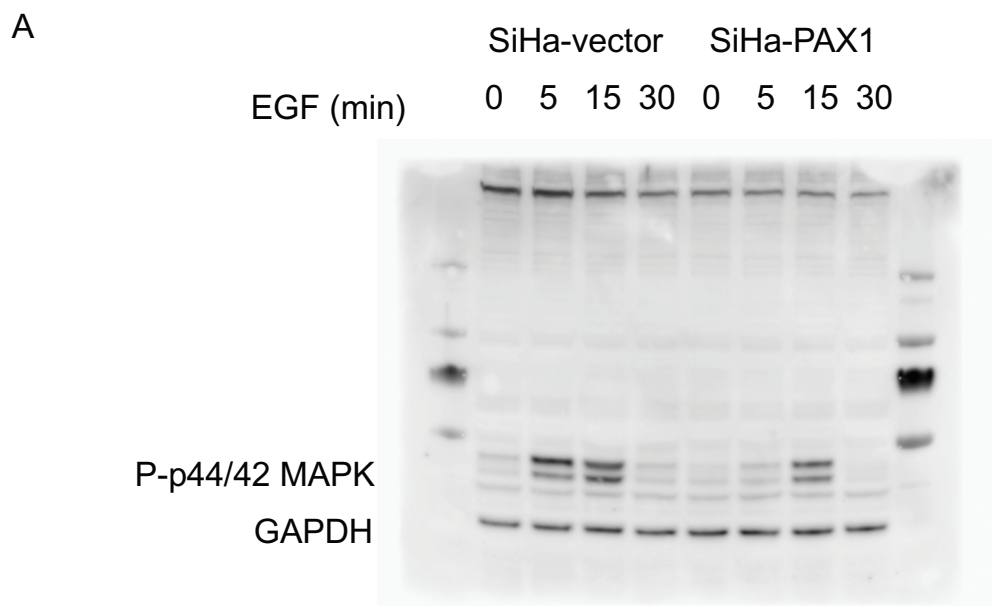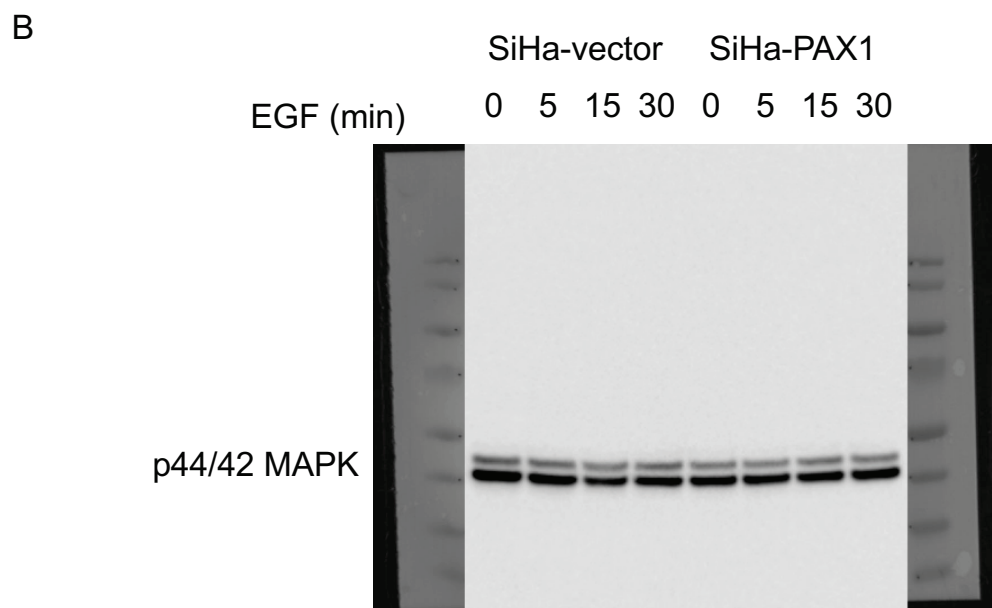

# Supplemental Figure 4

## A

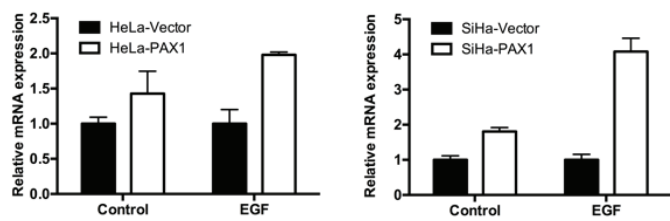

## B

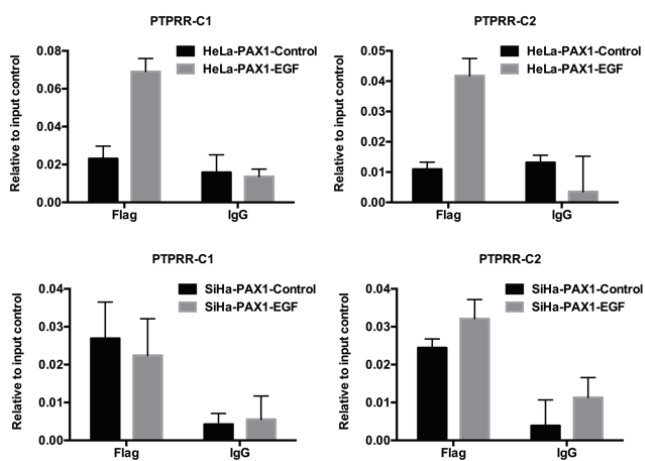

Supplemental Figure 5

A

Transcriptome analysis of  
PAX1-inhibited EGF signaling

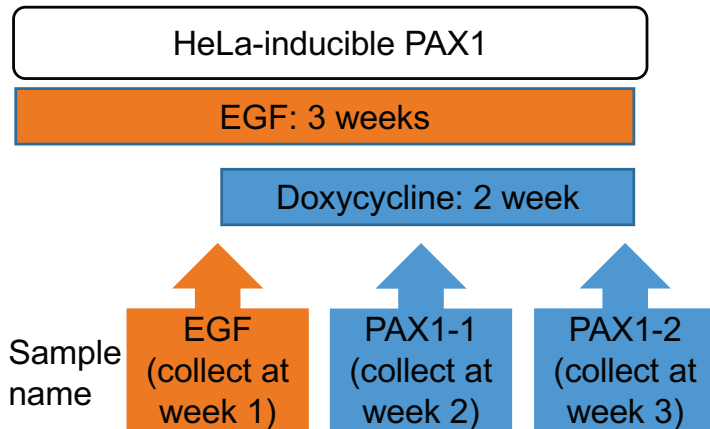

B

PAX1-1>EGF (1.25 fold)  
Or  
PAX1-2>EGF (1.25 fold)  
↓  
2780 probes (2534 genes)  
↓  
annotated with phosphatase  
↓  
34 probes (32 genes)

# Supplemental Figure 6

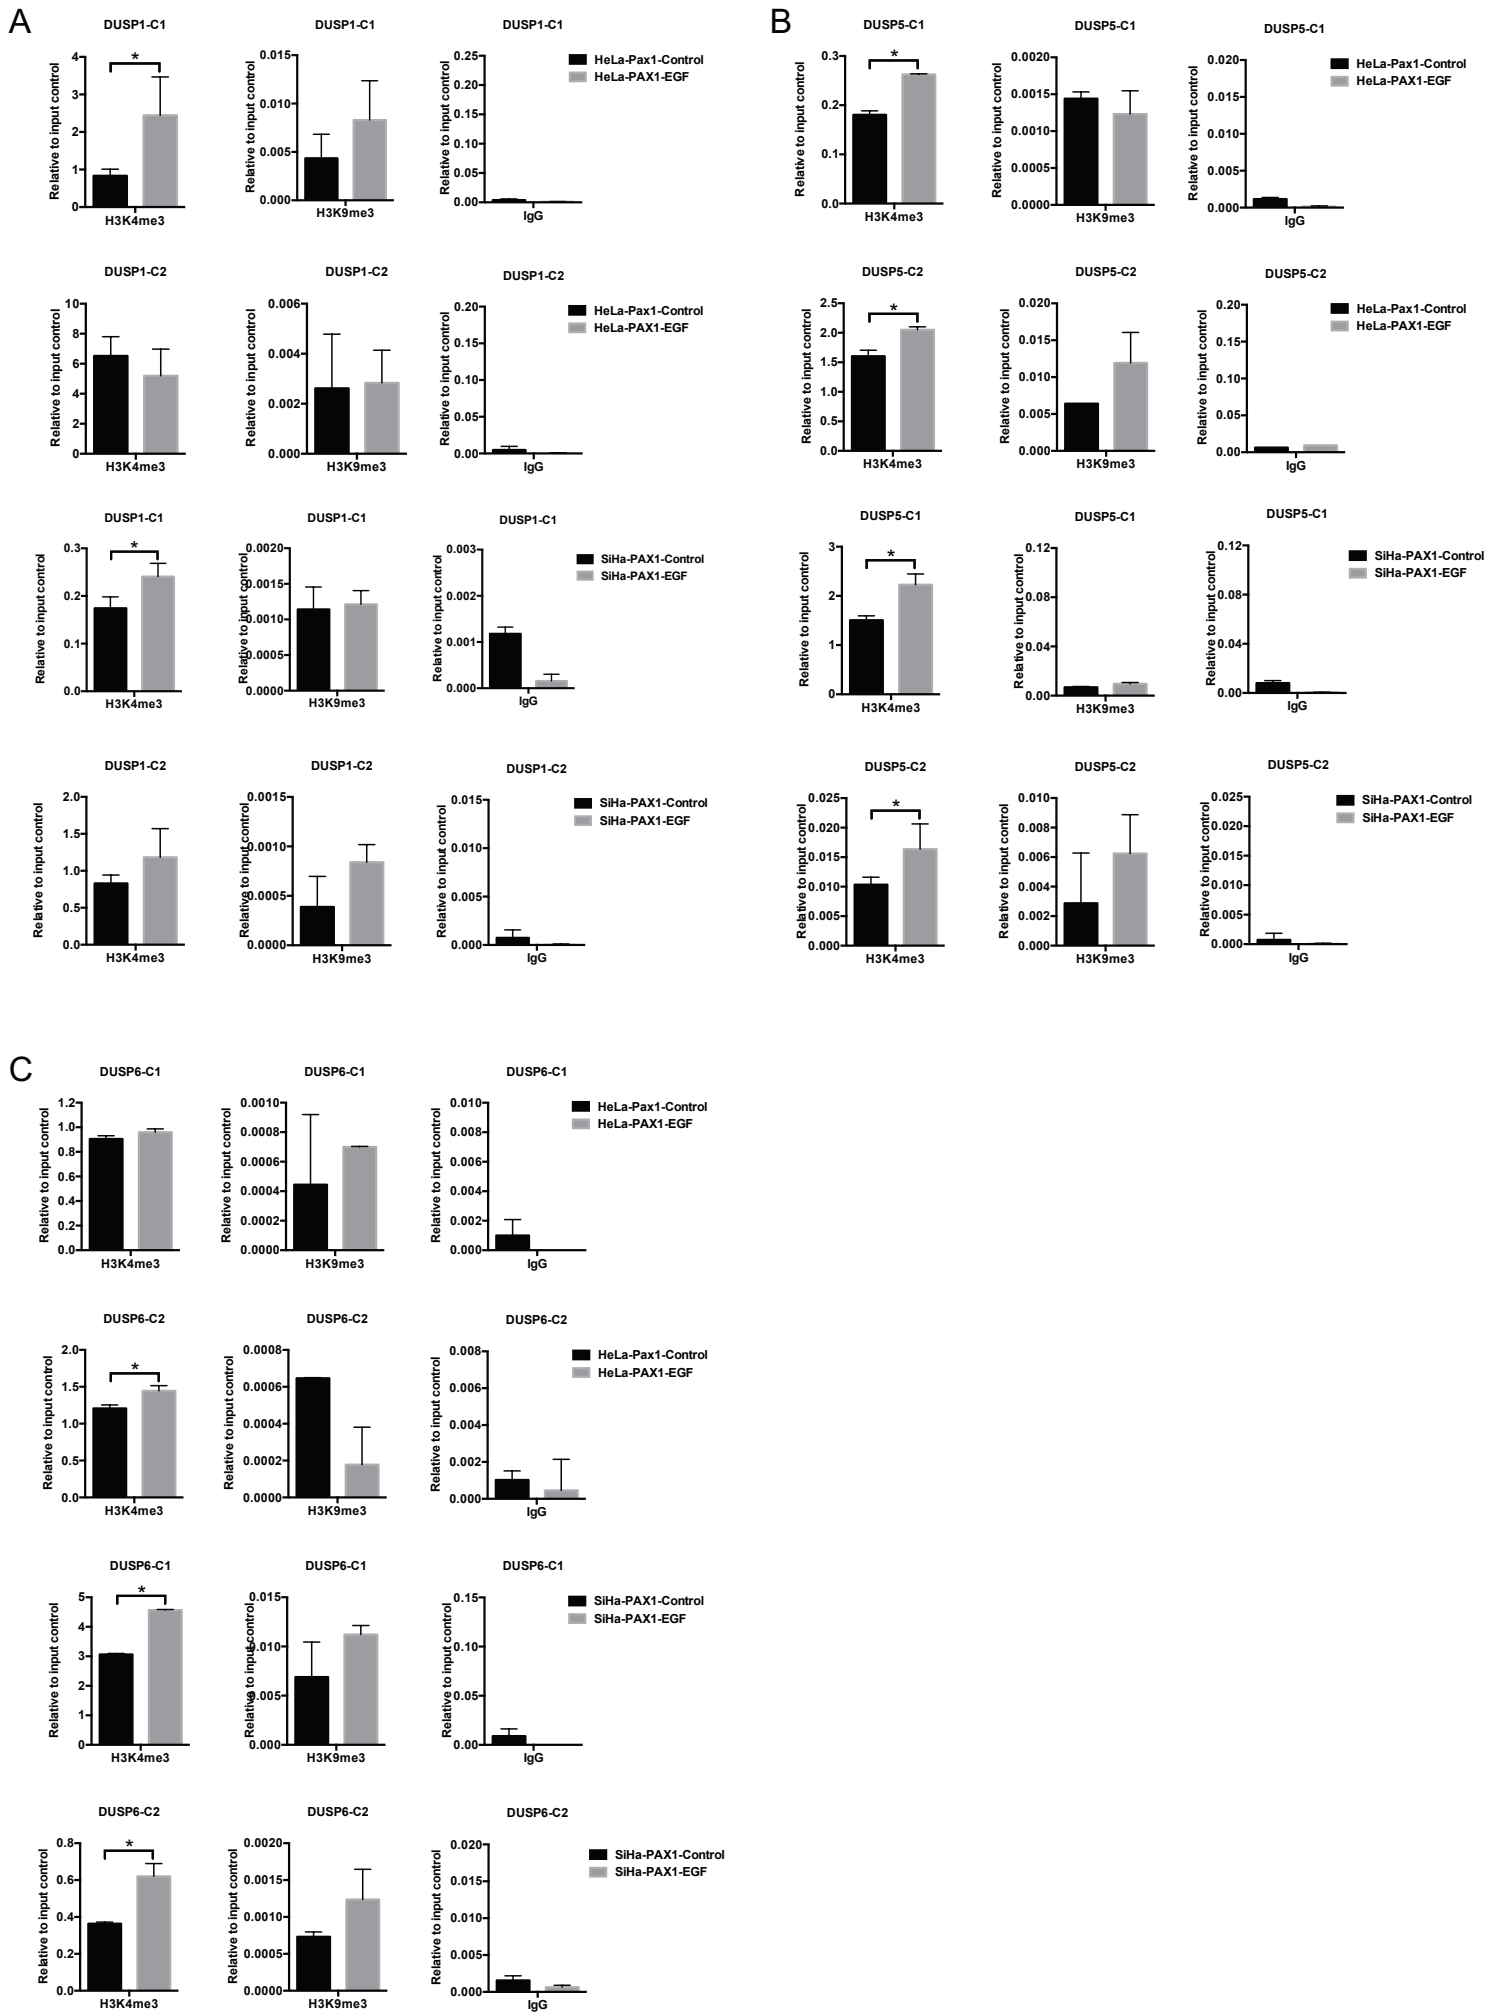



# Supplemental Figure 7

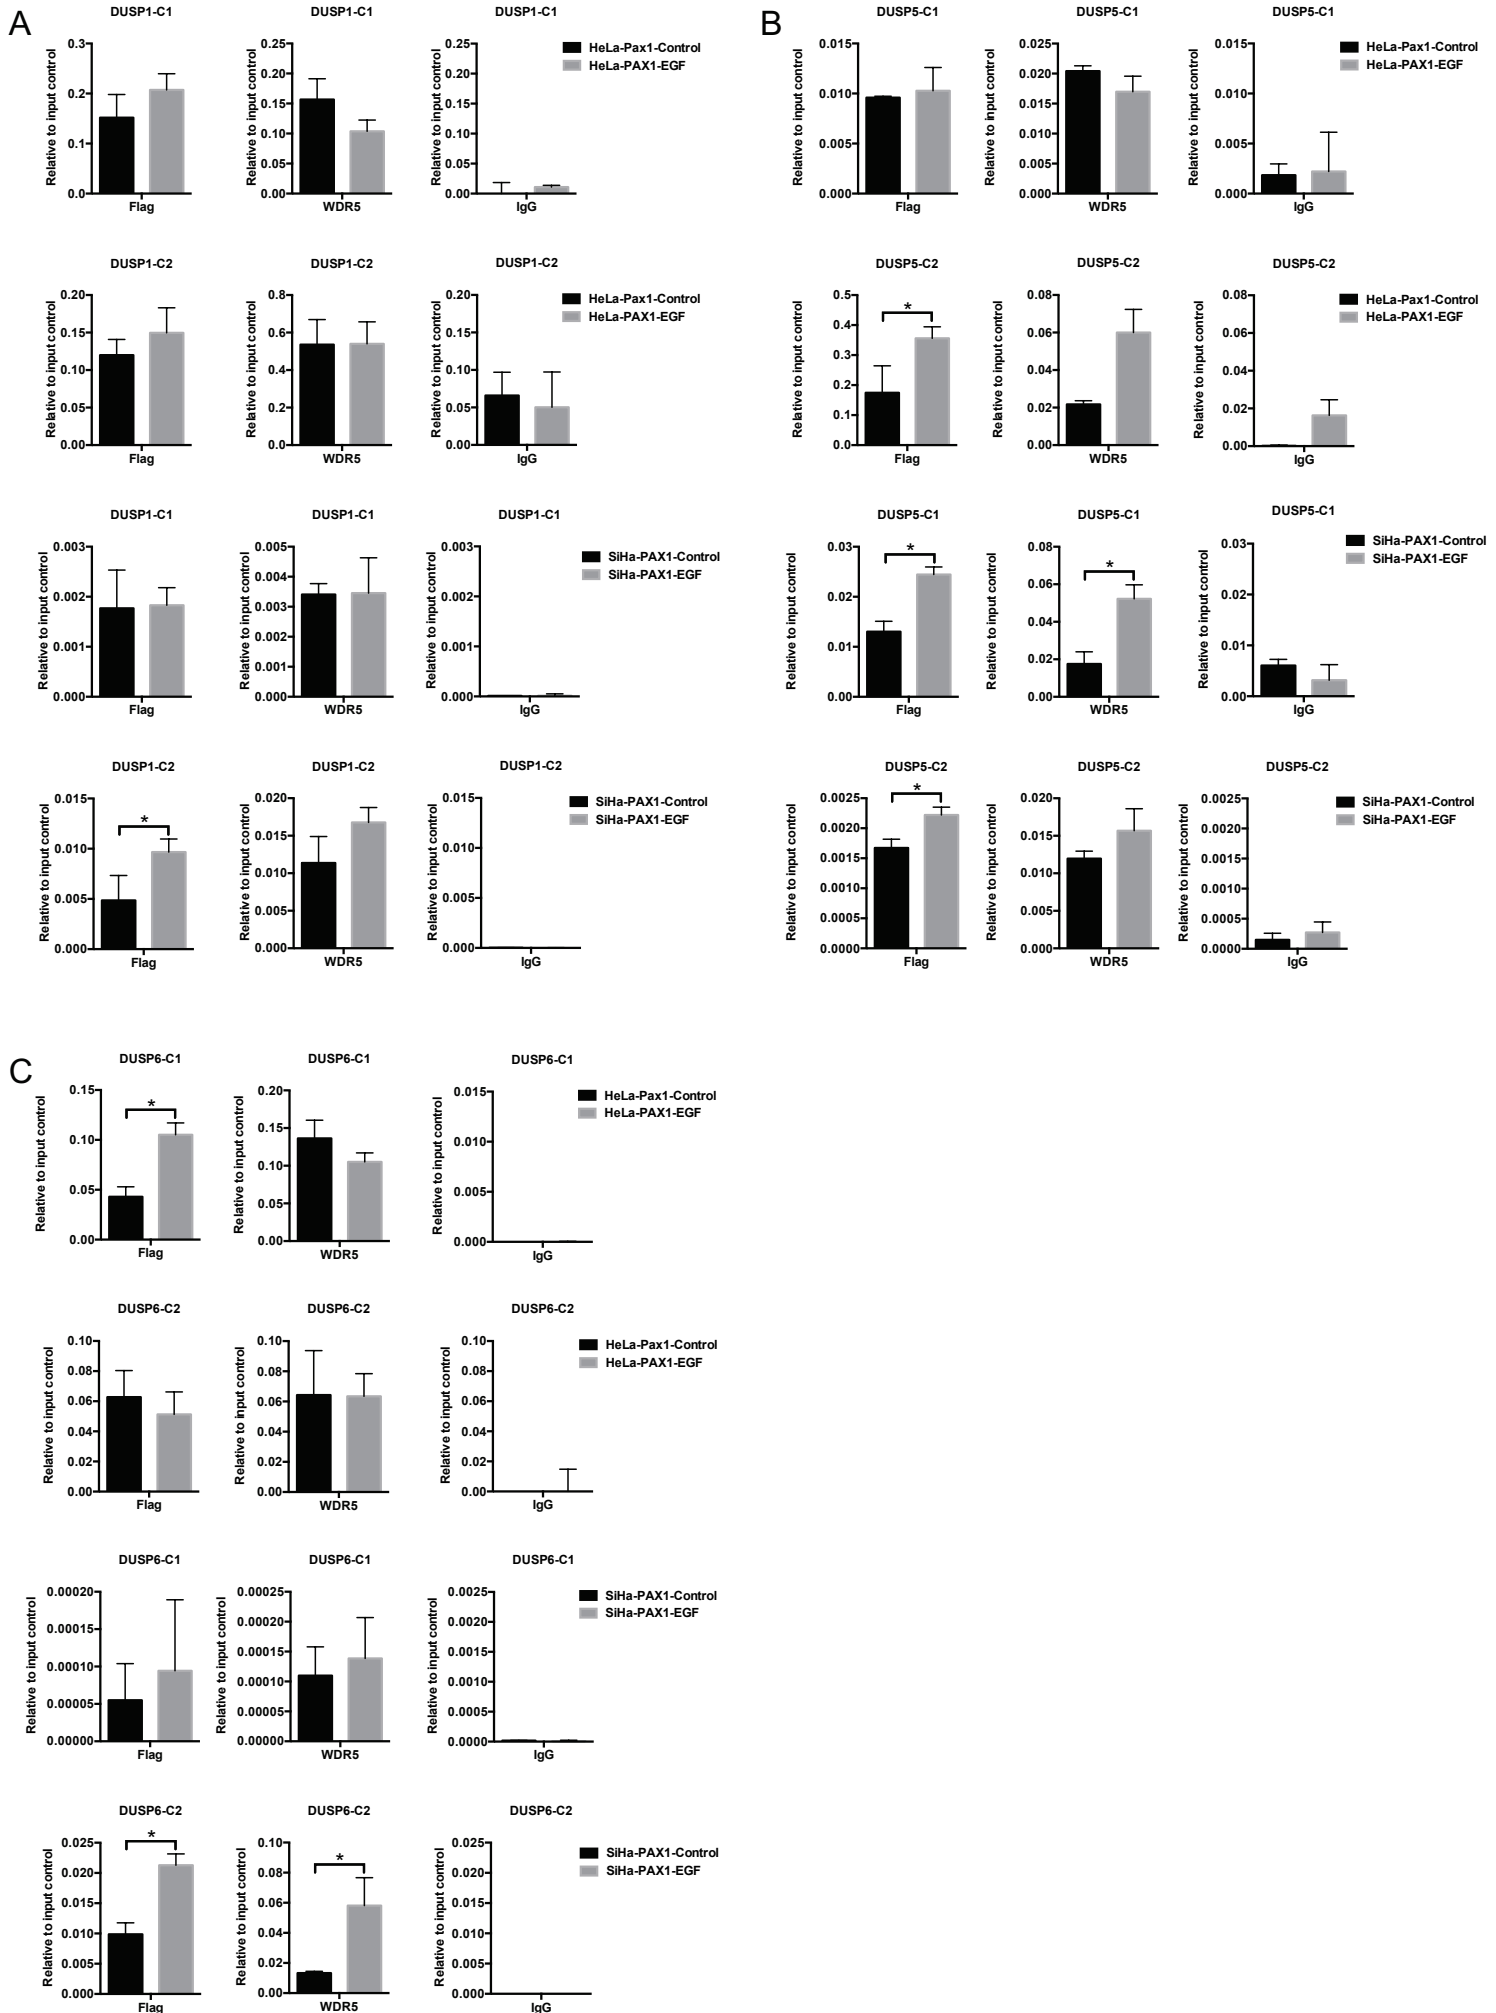

Supplemental Figure 8

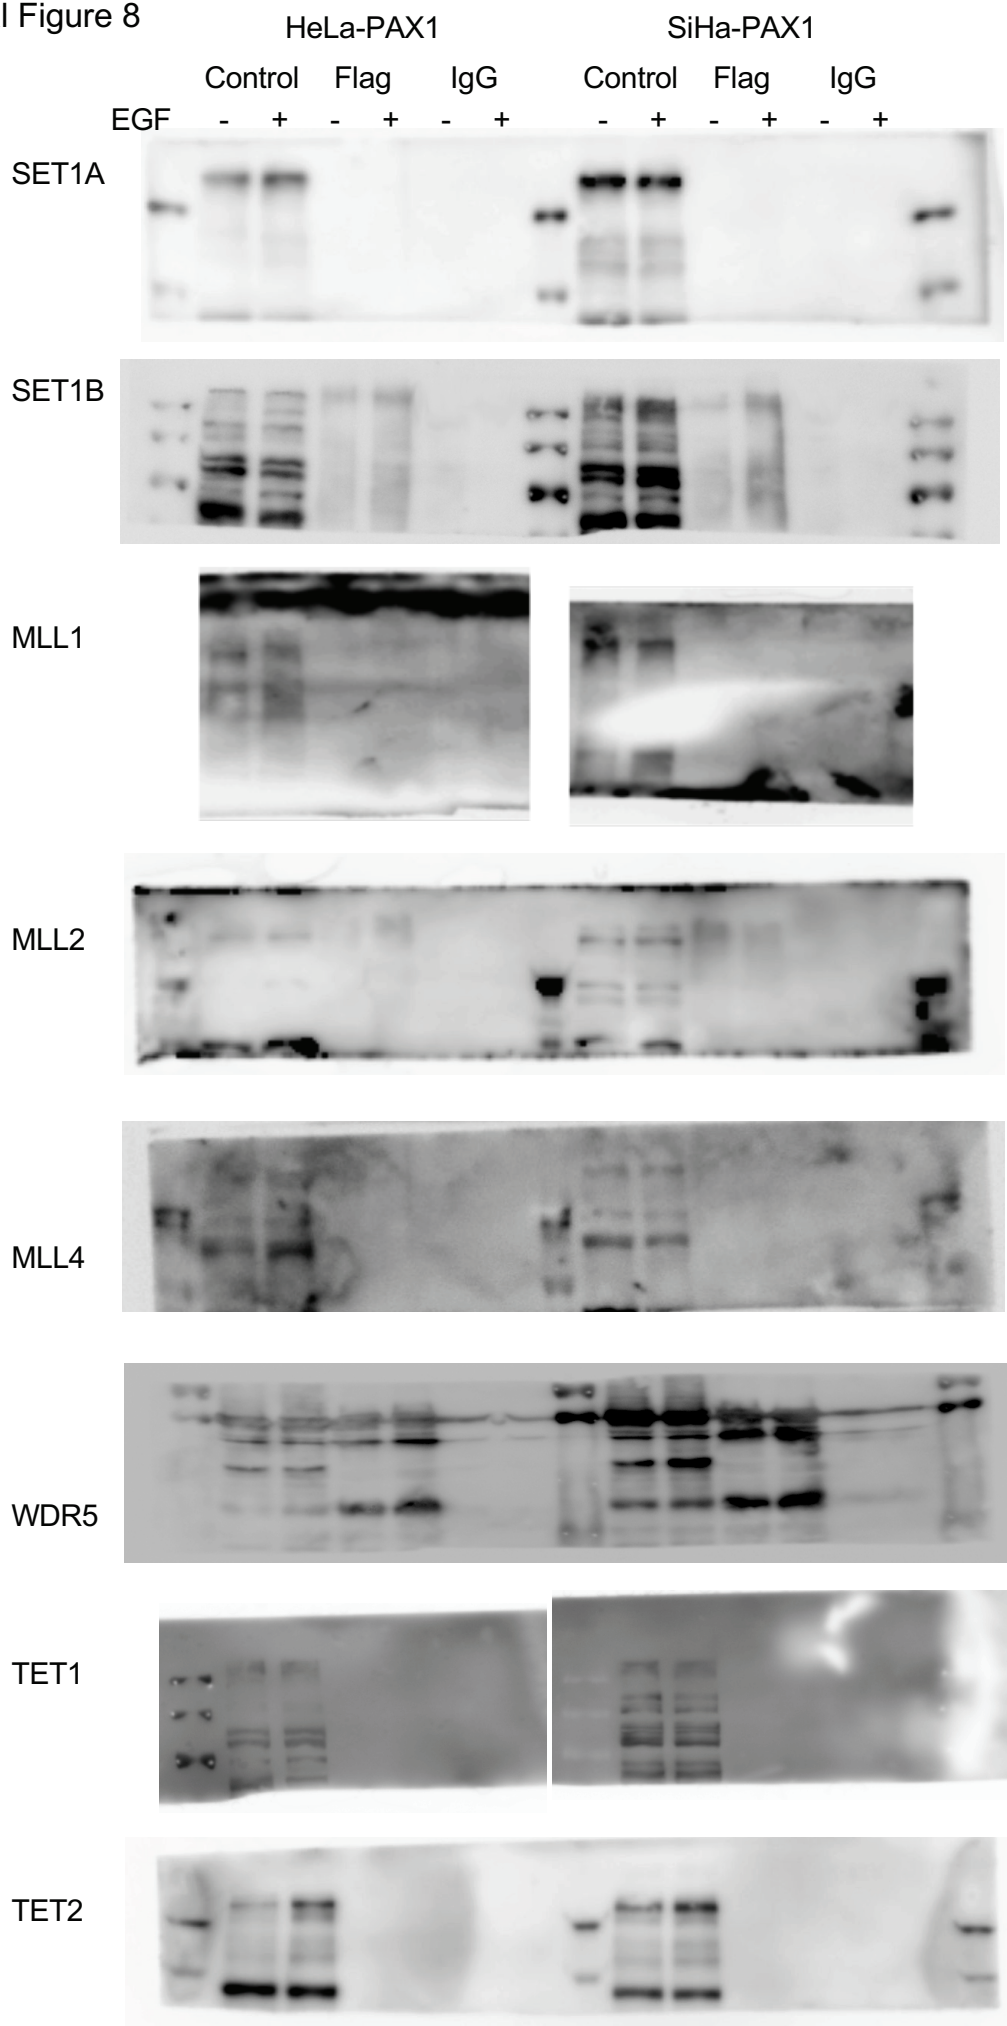

Supplemental Figure 9

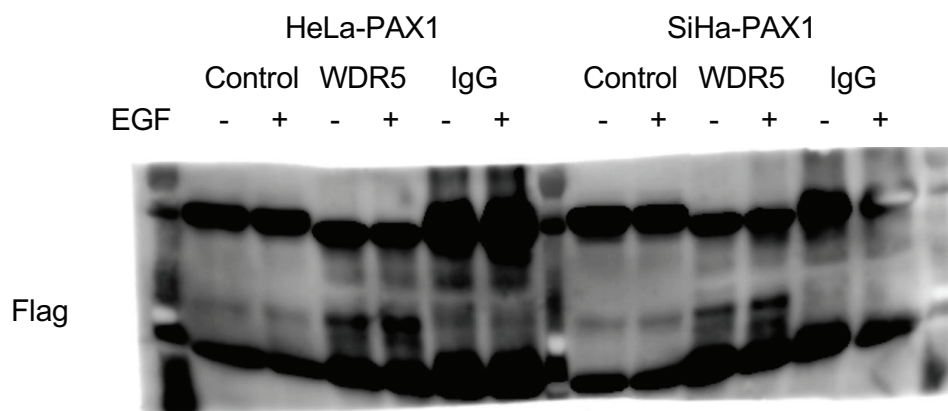

## **Supplementary figure legends**

### **Supplementary Figure S1. The effect of PAX1 on EMT markers.**

(A) HeLa-PAX1 cell. (B) SiHa-PAX1 cell. The expression of EMT marker, SNAIL was downregulated by PAX1 in both cell lines.

### **Supplementary Figure S2. The quantitative results of PAX1 inhibited kinase pathway.**

(A) EGF treatment. (B) IL-6 treatment.

### **Supplementary Figure S3. Uncropped blot of Figure 3D.**

(A) P-p44/42 MAPK. (B) p44/42 MAPK.

### **Supplementary Figure S4. PAX1 inhibited ERK1/2 phosphorylation may through activate PTPRR expression.**

(A) RT-qPCR shown the re-expression of PTPRR mRNA in PAX1-overexpressed HeLa and SiHa cells under EGF treatment. (B) CHIP-PCR results of PAX1 bind on PTPRR promoter under EGF treatment.

### **Supplementary Figure S5. Bioinformatics analysis of PAX1 regulated genes.**

(A) Condition of cell for transcriptome analysis. HeLa cell with doxycycline-inducible-PAX1 was treated with EGF for 1 week then treated with EGF and

doxycycline for 2 weeks. Samples were collected before doxycycline treatment, 1-week and 2-week doxycycline treatment. (B) Flowchart of bioinformatics analysis.

**Supplementary Figure S6. The binding of PAX1 and WDR5 on Phosphatases' promoter in PAX1 expressed cells after EGF treatment.**

(A) DUSP1. (B) DUSP5. (C) DUSP6. PAX1 and WDR5 were confirmed to bind the DUSP1, DUSP5, and DUSP6 promoters. The binding was increased after EGF treatment.

**Supplementary Figure S7. The status of histone H3K4 and H3K9 trimethylation on DUSPs promoter in PAX1 expressed cells after EGF treatment.**

(A) DUSP1. (B) DUSP5. (C) DUSP6. The H3K4 trimethylation was increased in the promoters of DUSP1, DUSP5, and DUSP6 lacking in changes with H3K9 trimethylation.

**Supplementary Figure S8. Uncropped blot of Figure 5E.**

**Supplementary Figure S9. Uncropped blot of Figure 5F.**

## Supplementary tables and legends

| Symbol   | Accession      | Symbol  | Accession      |
|----------|----------------|---------|----------------|
| ACYP2    | NM_138448.2    | PDP2    | NM_020786.1    |
| ALPP     | NM_001632.3    | PDPR    | XM_001134215.1 |
| CTDSPL   | NM_005808.2    | PPA2    | NM_006903.4    |
| DUSP1    | NM_004417.2    | PPEF1   | NM_152224.1    |
| DUSP19   | NM_080876.2    | PPM1B   | NM_001033556.1 |
| DUSP3    | NM_004090.2    | PPM1K   | NM_152542.2    |
| DUSP4    | NM_057158.2    | PPP1R10 | NM_002714.2    |
| DUSP5    | NM_004419.3    | PPP1R3C | NM_005398.4    |
| DUSP5P   | NR_002834.1    | PPP2R5A | NM_006243.2    |
| DUSP6    | NM_022652.2    | PTP4A2  | XM_944907.1    |
| DUSP8    | NM_004420.2    | PTP4A2  | XM_944915.1    |
| DUT      | NM_001025248.1 | PTPLA   | NM_014241.3    |
| DUT      | NM_001025249.1 | PTPLAD2 | NM_001010915.1 |
| FLJ30092 | XM_933560.1    | PTPN20  | XM_937744.1    |
| G6PC3    | NM_138387.2    | PTPN4   | NM_002830.2    |
| IMPA2    | NM_014214.1    | PTPRK   | NM_002844.2    |

### Supplementary Table S1. Phosphatases activated by PAX1.

### Supplementary Table S2. Pathways affected by PAX1.

| Quantitative real-time PCR primers |                          |                          |
|------------------------------------|--------------------------|--------------------------|
| Gene                               | Forward primer           | Reverse primer           |
| GAPDH                              | ACCCACTCCTCCACCTTTGACG   | TCTCTTCCTCTTGTGCTCTTG    |
| PAX1                               | CCTACGCTGCCCTACAACCACATC | TCACGCCGGCCCAGTCTTCCATCT |
| PTPRR                              | CATGCTGGATGTAGAAGAAGACA  | AACACCCTGTTCTACCTATTCTG  |
| DUSP1                              | TTCAACGAGGCCATTGACTT     | CCTGGCAGTGGACAAACAC      |
| DUSP4v1                            | GACATCTGCCTGCTCAAAGG     | CAAGGGCTCTGTGGCACT       |
| DUSP4v2                            | AGCCAGACCGATTGAGAG       | AGCAATGGTGGGGCTAGAG      |
| DUSP5                              | ACAAATGGATCCCTGTGGAA     | CCTCCCTTTTCCCTGACAC      |
| DUSP6v1                            | CGACTGGAACGAGAATACGG     | TTGGAACCTTACTGAAGCCACCT  |
| DUSP6v2                            | ACACAGTGGTGTCTACGAC      | CGGGCTTCATCTTCCAGGTA     |
| DUSP8                              | GACCATTGCGGAGCTCAT       | TCATAGACCACCACGTCCTGT    |
| DUSP19v1                           | GGTTGCTCCTAGGGTCACAA     | AGGATGTTGGTTTCAGGCAGA    |
| DUSP19v2                           | ATGTGCAGGACCTTAGCTCG     | AAGAACCACTCCATCCTTATTCTT |

**Supplementary Table S3. Quantitative real-time PCR primers.**

| qMS-PCR primers |                                 |                                    |
|-----------------|---------------------------------|------------------------------------|
| Gene            | Forward primer                  | Reverse primer                     |
| PTPRR-M1        | TTAAGTCGTCGTTAAGATTCGGAGA<br>AG | CCCAACGCCGACCCTCAC                 |
| PTPRR-M2        | AAGTTGGTGTTGGTTTTTGTGGC         | ACACAACGCAAAAAACAACTACT<br>CTCC    |
| DUSP1-M1        | GTTGTGGTCGGTTTTTGTTCG           | AAAACCGCCCGACACG                   |
| DUSP1-M2        | GATTTAGTTTCGAGGTTGATGACG        | CGCAACGAACCTAACCCG                 |
| DUSP5-M1        | AAGTTTGGTTTACGTGGGTGTTTCG<br>C  | ACGCGCGAAACGAATACCGAC              |
| DUSP5-M2        | AAGTTTGGTTTACGTGGGTGTTTCG<br>C  | CAAATACATCCACCCAAAAACGCTA<br>TCCTC |
| DUSP6-M1        | TTTTCGCGGTGTTTACGGTAGGC         | AAACCGCGCTTTATCCCACC               |
| DUSP6-M2        | AGGGGGGTTTCGGTAGGTATTC          | GAAAAACACCAACCGCGCCTAC             |

**Supplemental Table S4. qMS-PCR primers.**



| ChIP-PCR primers |                        |                       |
|------------------|------------------------|-----------------------|
| Gene             | Forward primer         | Reverse primer        |
| PTPRR-C1         | AAGCTGGTGCTGGTTTCTGT   | TGCTCTCCGCATAGTGTTTG  |
| PTPRR-C2         | GAGCCTACTCTGCTCCAAGC   | CAGTAGGAGGTTGCGGGTAA  |
| DUSP1-C1         | GCTCGAGTCGGTCTTGGTAG   | ACTCTTGTGCCCTTTTCCT   |
| DUSP1-C2         | CCCAGAGGCCGCATATAAAC   | CGCTTTTGGACTGAGAGAGG  |
| DUSP5-C1         | GTCCTGGTGTCTGATTTGATTG | ATTGTTAGCCTGGCTGGGACT |
| DUSP5-C2         | TCTCCGACGTCCTCTCCTTA   | GATCCGGCCTTCAGCTTC    |
| DUSP6-C1         | AGGTCCCAATGACTGAAACG   | AGGCCTAGGTTGCCAATTTT  |

**Supplementary Table S5. ChIP-PCR primers.**
